# Supplementary material for: Synthesis of poly(l-lactide)-b-poly(amino acid) block copolymers by noncovalent protection of hetero-initiators
Source: Royal Society of Chemistry journal article supplement (doi:10.1039/d4py00739e), 2024-01-01
Supplement: d4py00739e1.pdf [file d4py00739e1.pdf]

## Synthesis of poly(L-lactide)-*b*-poly(amino acid)s block copolymers by noncovalent protection of hetero-initiator

Siheng Zhang,<sup>a</sup> Jianda Niu,<sup>a</sup> Enchi Hu,<sup>a</sup> Liguo Xu,<sup>b</sup> Zhixian Dong,<sup>a</sup> Jinbao Xu,<sup>\*a</sup> and Caihong Lei<sup>\*a</sup>

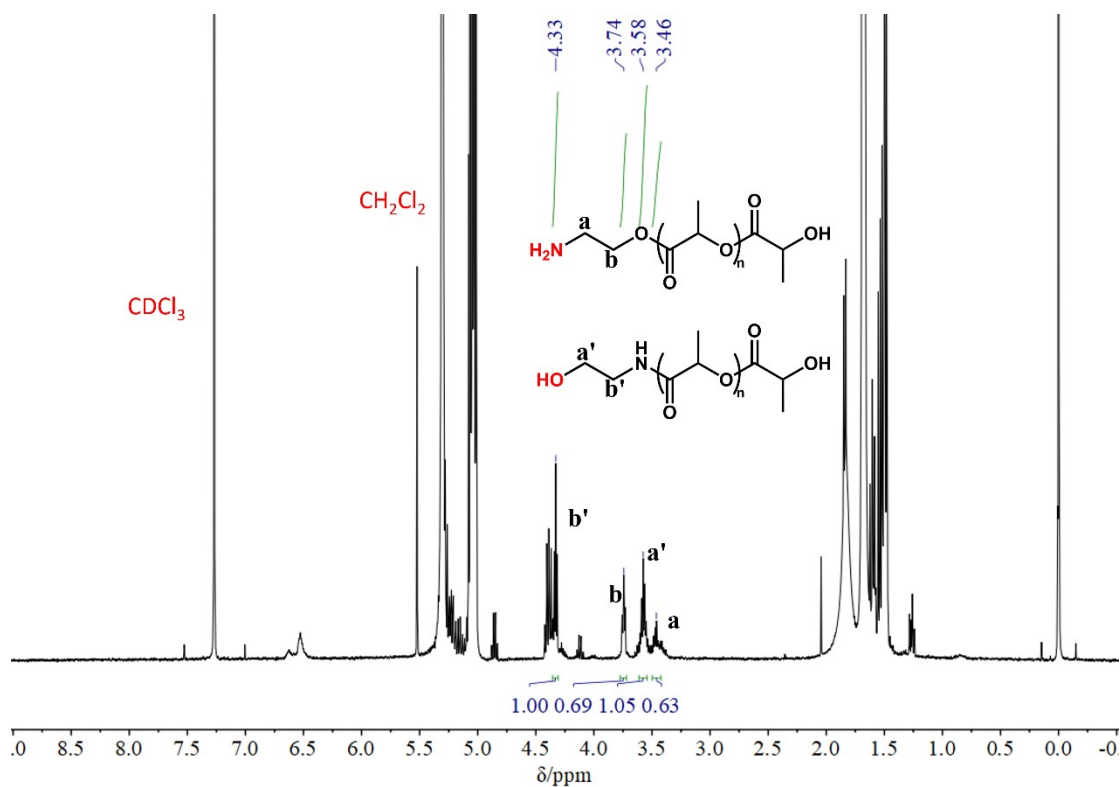

**Fig. S1.** <sup>1</sup>H NMR spectrum of LA mixed with AE in DCM at room temperature to observe the possible reaction (CDCl<sub>3</sub>).

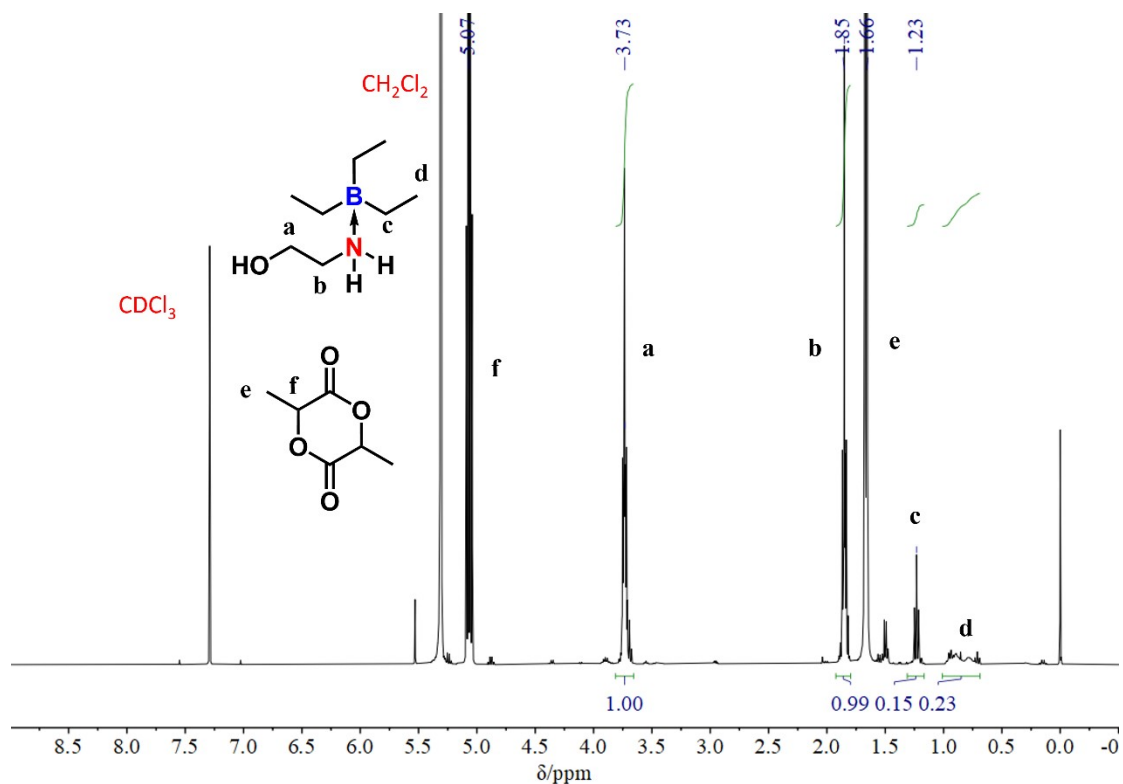

**Fig. S2.**  $^1\text{H}$  NMR spectrum of LA mixed with AE protected by  $\text{Et}_3\text{B}$  in  $\text{DCM}$  at room temperature ( $\text{CDCl}_3$ ).

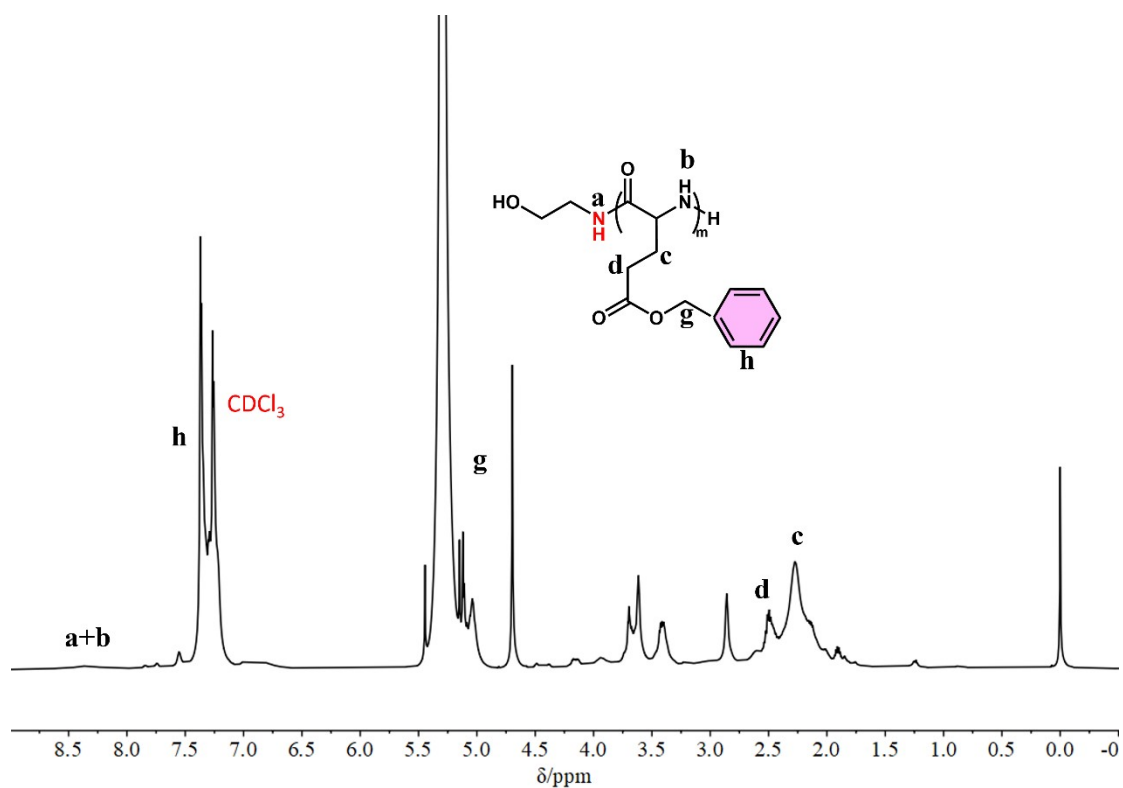

**Fig. S3.**  $^1\text{H}$  NMR spectrum of Bn-GLuNCA mixed with AE in  $\text{DCM}$  for 16 h ( $\text{CDCl}_3$ ).

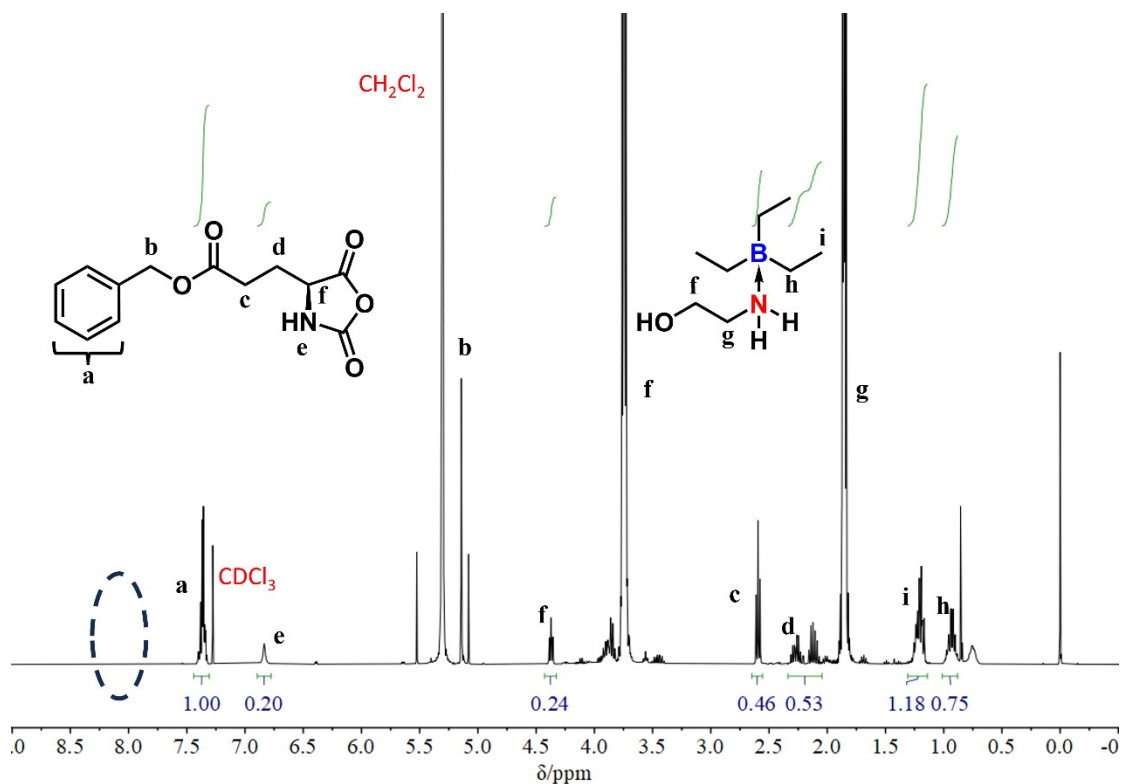

**Fig. S4.** <sup>1</sup>H NMR spectrum of Bn-GLuNCA mixed with AE protected by Et<sub>3</sub>B in DCM for 4 h (CDCl<sub>3</sub>).

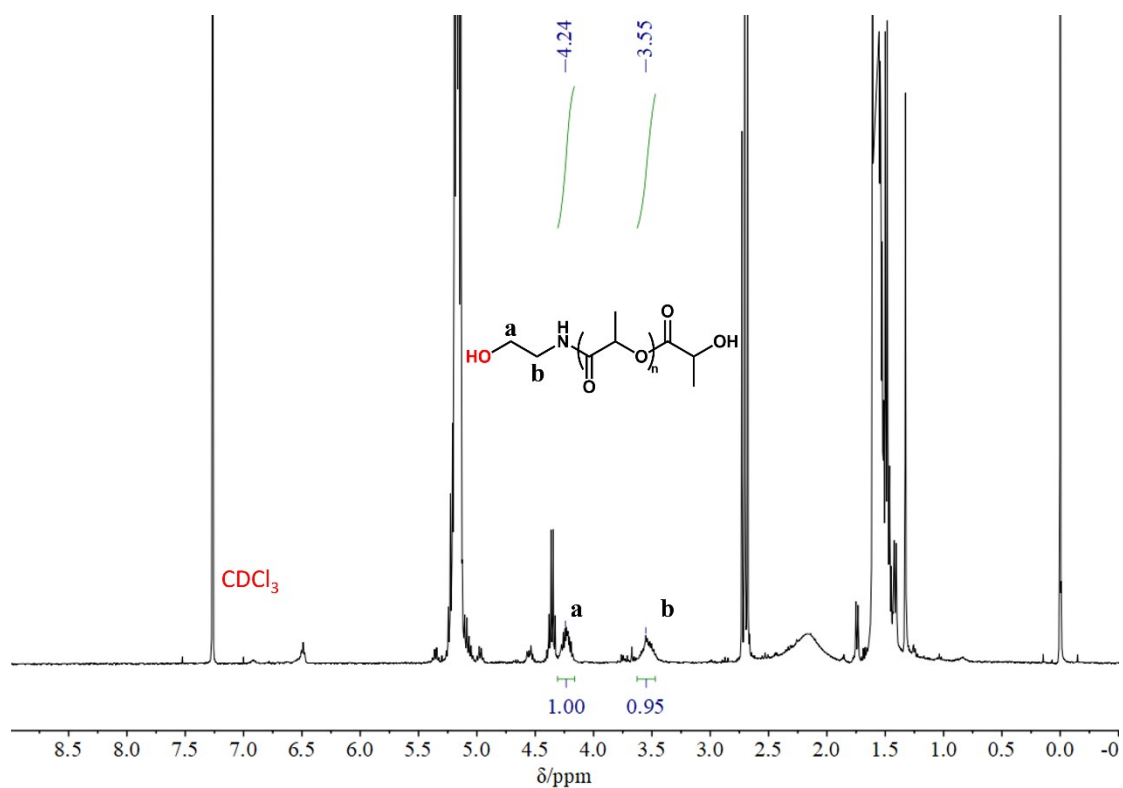

**Fig. S5.** <sup>1</sup>H NMR spectrum of the isolated product of LA mixed with AE and DBU in DCM (CDCl<sub>3</sub>).

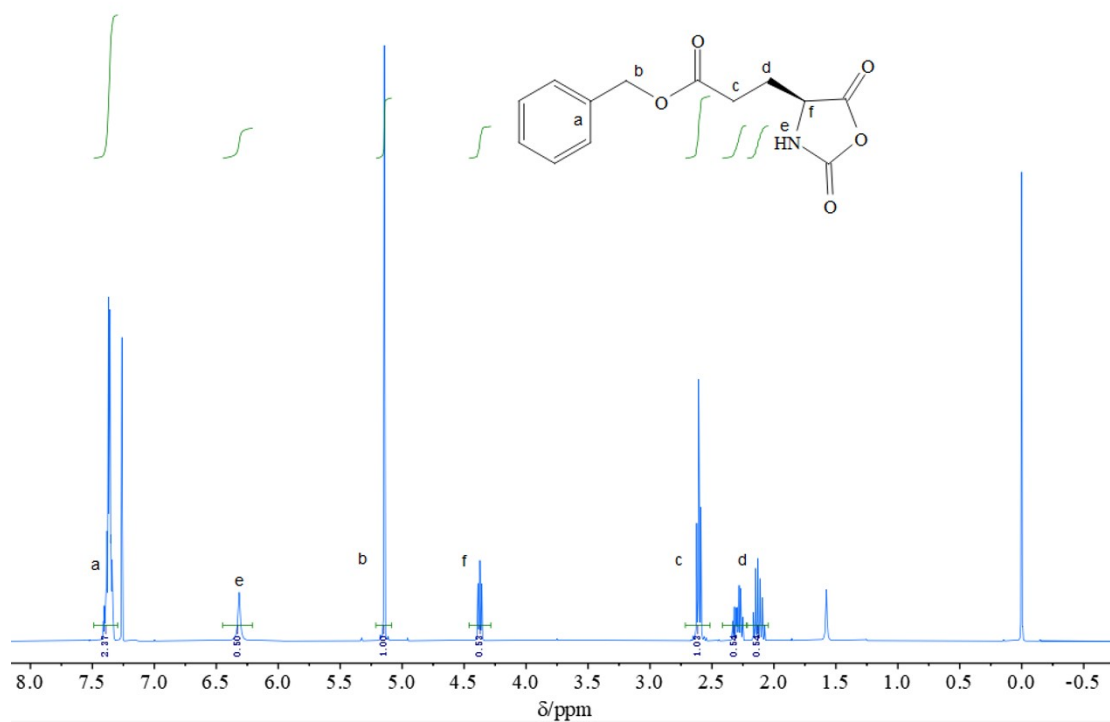

**Fig. S6.**  $^1\text{H}$  NMR spectrum of the isolated product of Bn-GLuNCA ( $\text{CDCl}_3$ ).

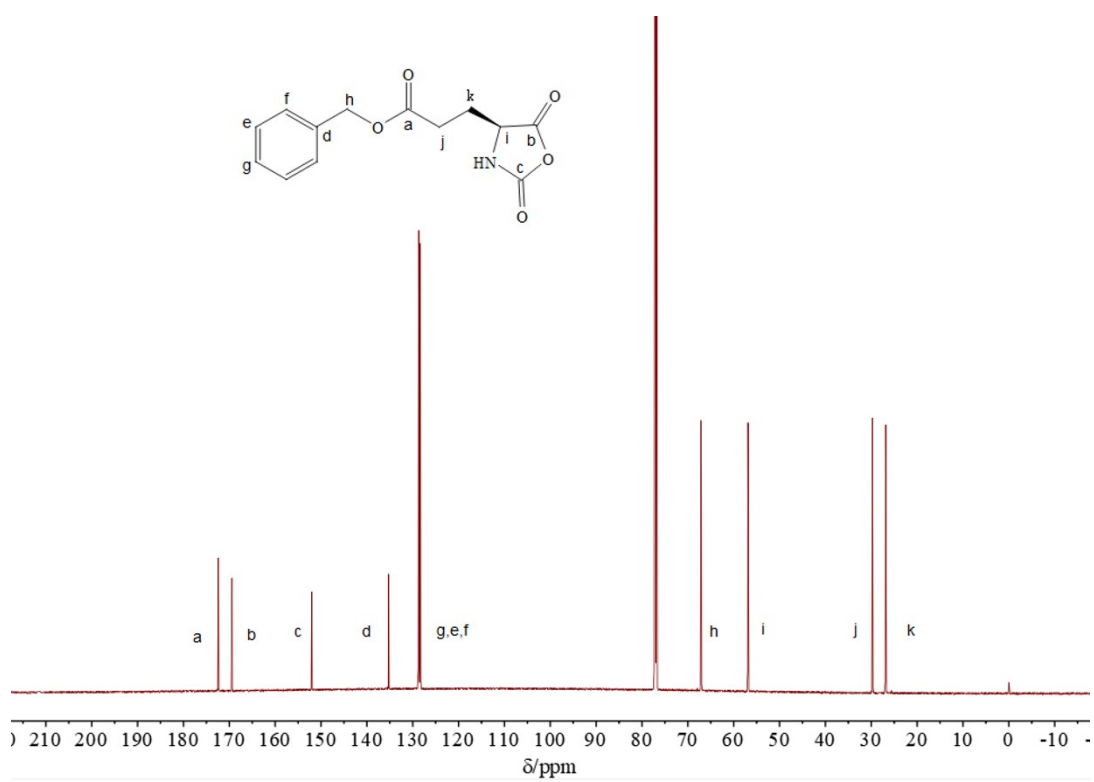

**Fig. S7.**  $^{13}\text{C}$  NMR spectrum of the isolated product of BLG-NCA ( $\text{CDCl}_3$ ).

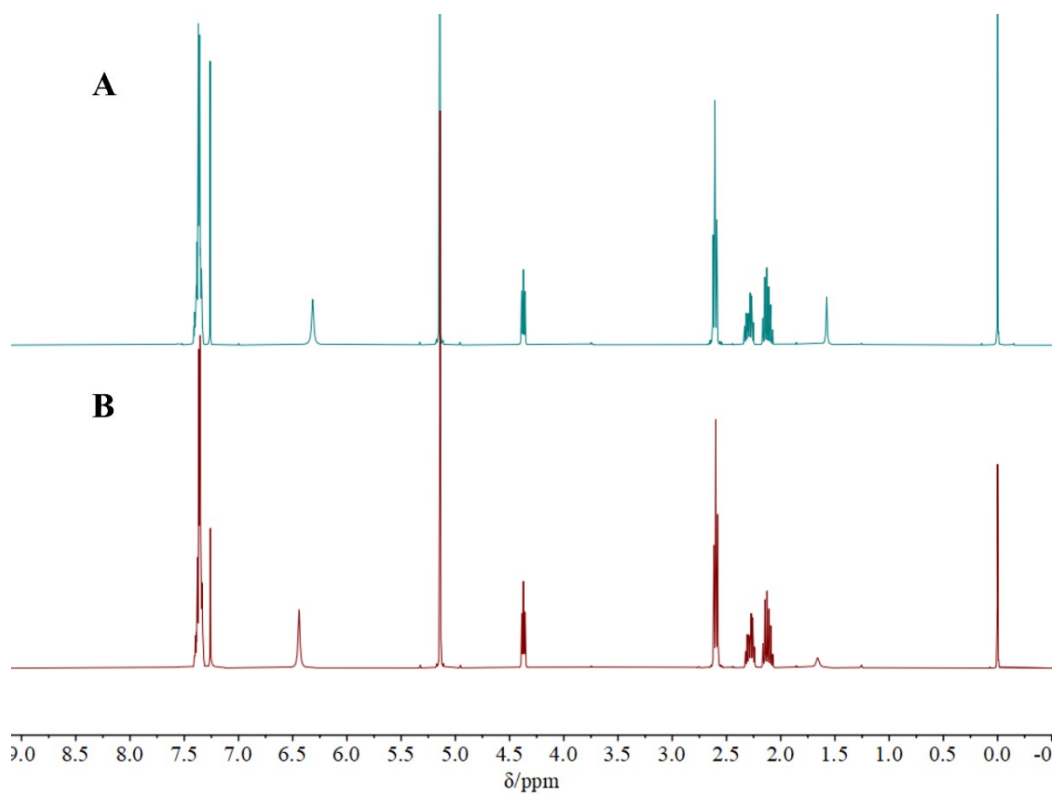

**Fig. S8.** <sup>1</sup>H NMR spectrum of the isolated product (A in 2023 and B in 2024) of Bn-GLuNCA (CDCl<sub>3</sub>).
